# Supplementary material for: Zebrafish Avatar-test forecasts clinical response to chemotherapy in patients with colorectal cancer
Source: PubMed Central journal article supplement (PMC11153622; doi:10.1038/s41467-024-49051-0), 2024-06-05
Supplement: 41467_2024_49051_MOESM3_ESM.pdf [file 41467_2024_49051_MOESM3_ESM.pdf]

## Description of Additional Supplementary Files

**Supplementary Data 1:** Clinical data of CRC patients included in the study.

**Supplementary Data 2:** Patient and zAvatars outcomes and correlations.

**Supplementary Movie 1:** Time-lapse movie of a liver metastasis sample from a colon cancer patient injected into Tg(*mpeg1:mCherry-F*), a zebrafish macrophage reporter line. The video specifically focuses on the tail region.
